# Supplementary material
Source: PubMed Central journal article supplement (PMC4920078)
Supplement: NIHMS792258-supplement-Supplementary_Figures.pdf [file NIHMS792258-supplement-Supplementary_Figures.pdf]

**Supplemental Figure 1: Functional families of proteins from which newly presented peptides have a similar to the distribution in uninfected samples**

- Immune system processes
- Cellular oragnisation or biogenesis
- Cellular process
- Localisation
- Apoptosis
- Reproduction
- Biologic regulation
- Response to stimulus
- Developmental process
- Multicellular organism process
- Adhesion
- Metabolism

A\*01;01

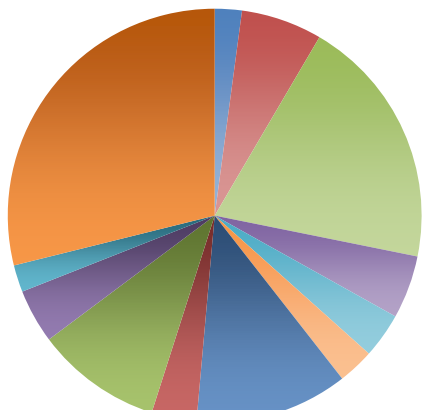

116

A\*02;01

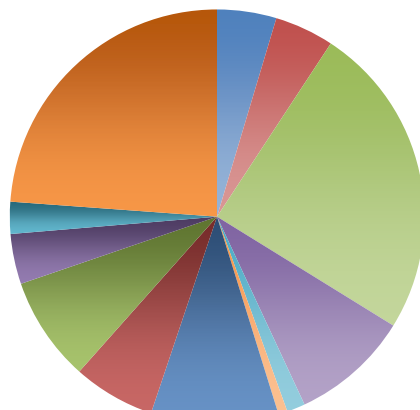

331

B\*07;02

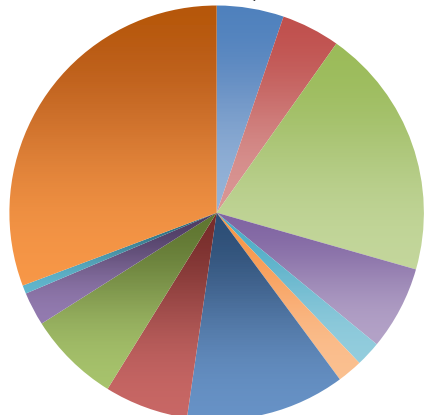

91

B\*35;01

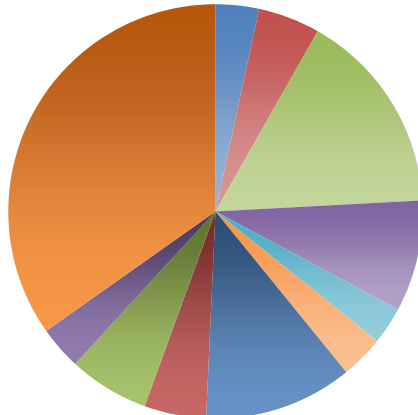

95

B\*45;01

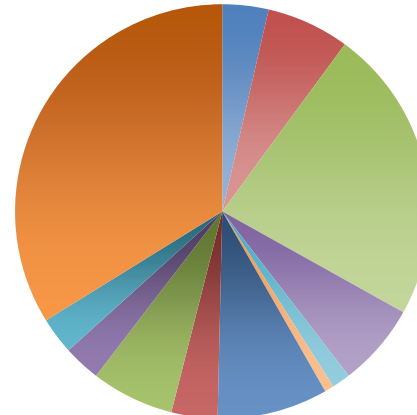

38

**Supplemental Figure 1: Functional families of proteins from which newly presented peptides have a similar to the distribution in uninfected samples.** Panther GO Biological Process identification of the proteins from which constitutively presented peptides are derived in uninfected cells compared with infected cells as in Figure 2. Proteins were searched using the Panther database and reported here as the proportion of each functional classifications.

**Supplemental Figure 2: Peptides presented after infection are derived from proteins encoded by genes dispersed across the chromosomes.**

# A. HLA-A\*01:01-restricted self peptides

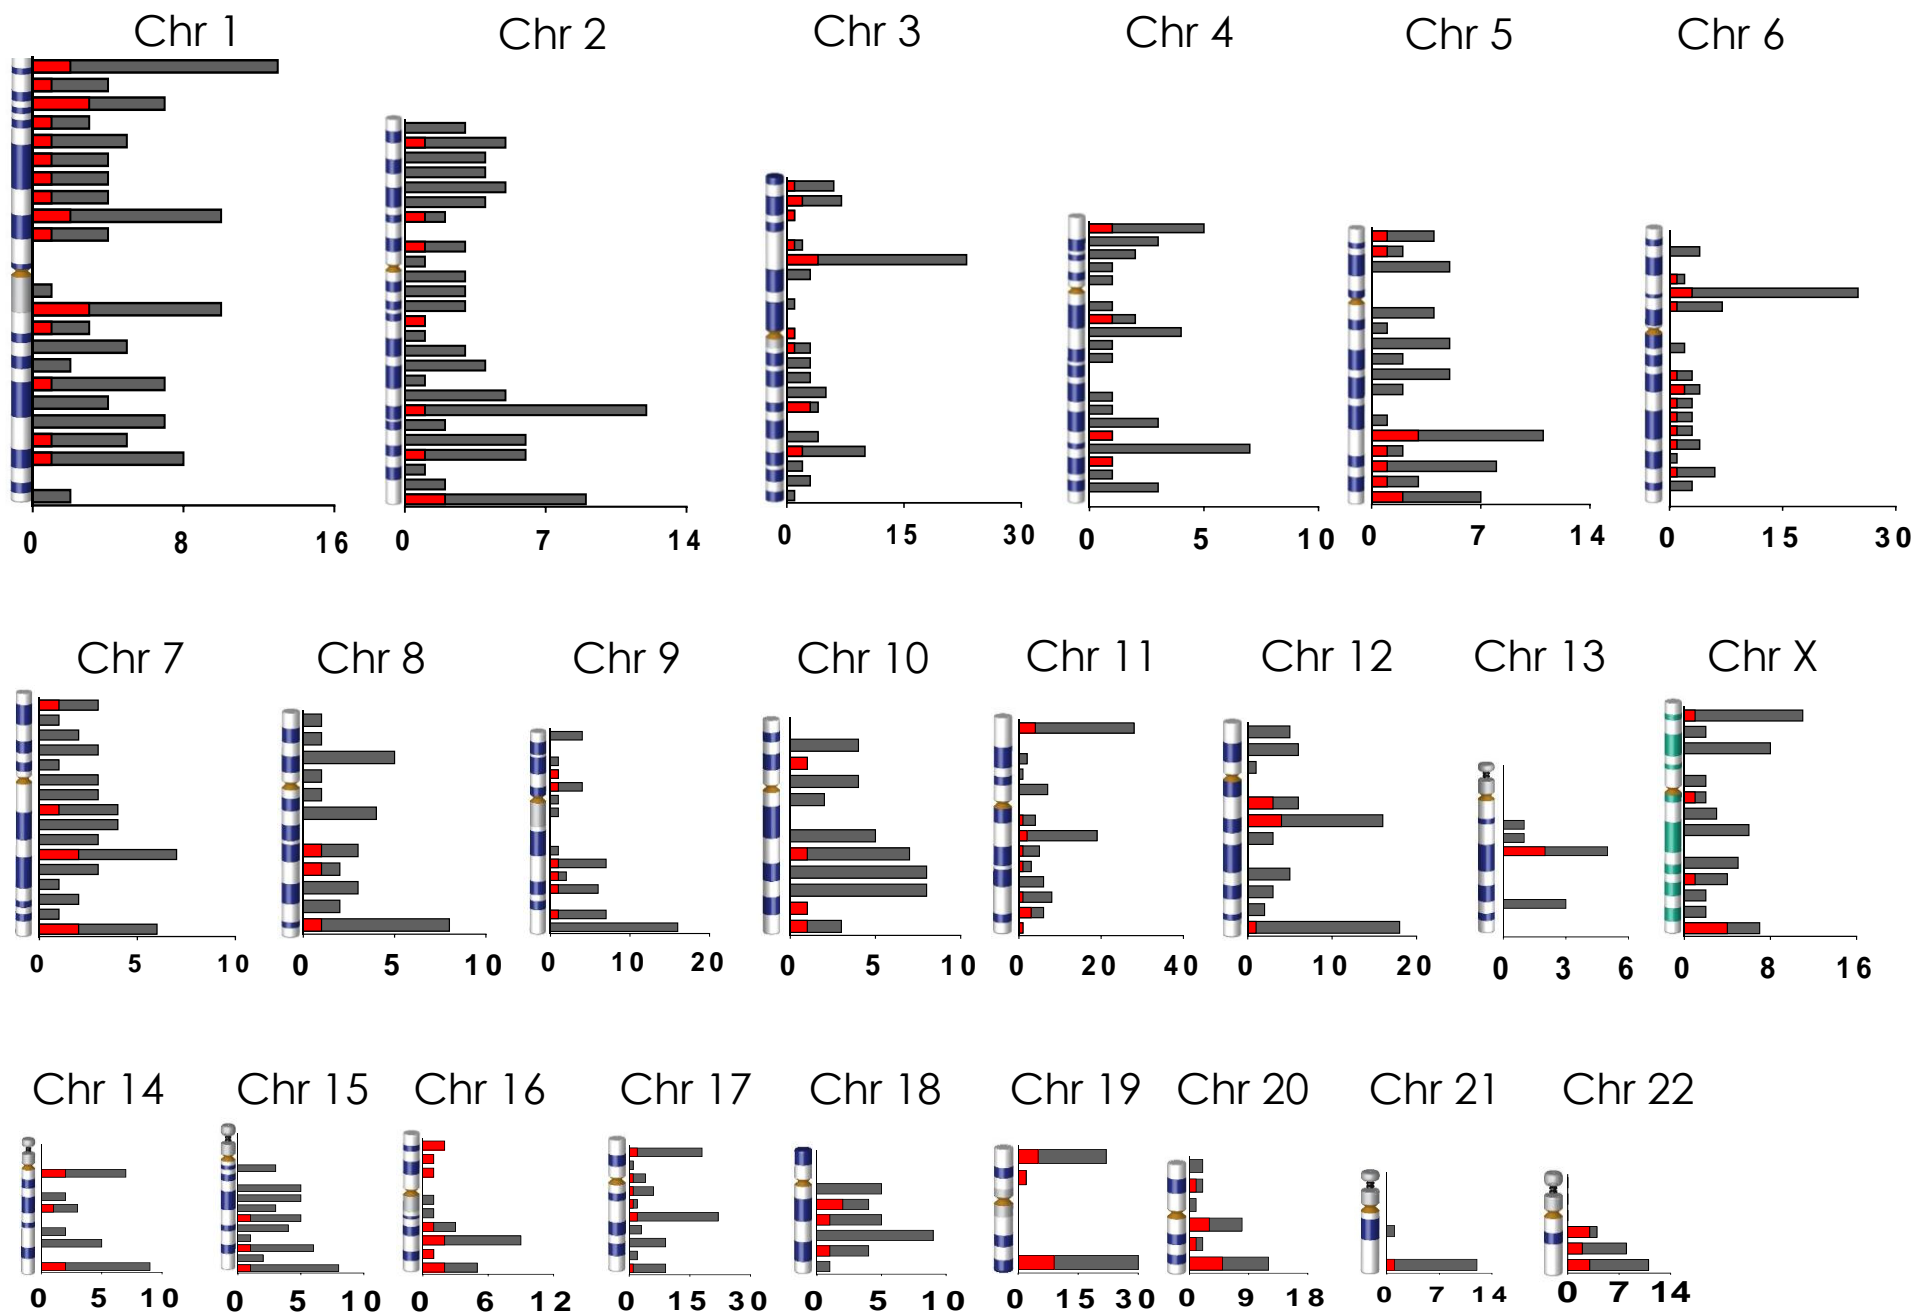

## B. HLA-A\*02:01-restricted self peptides

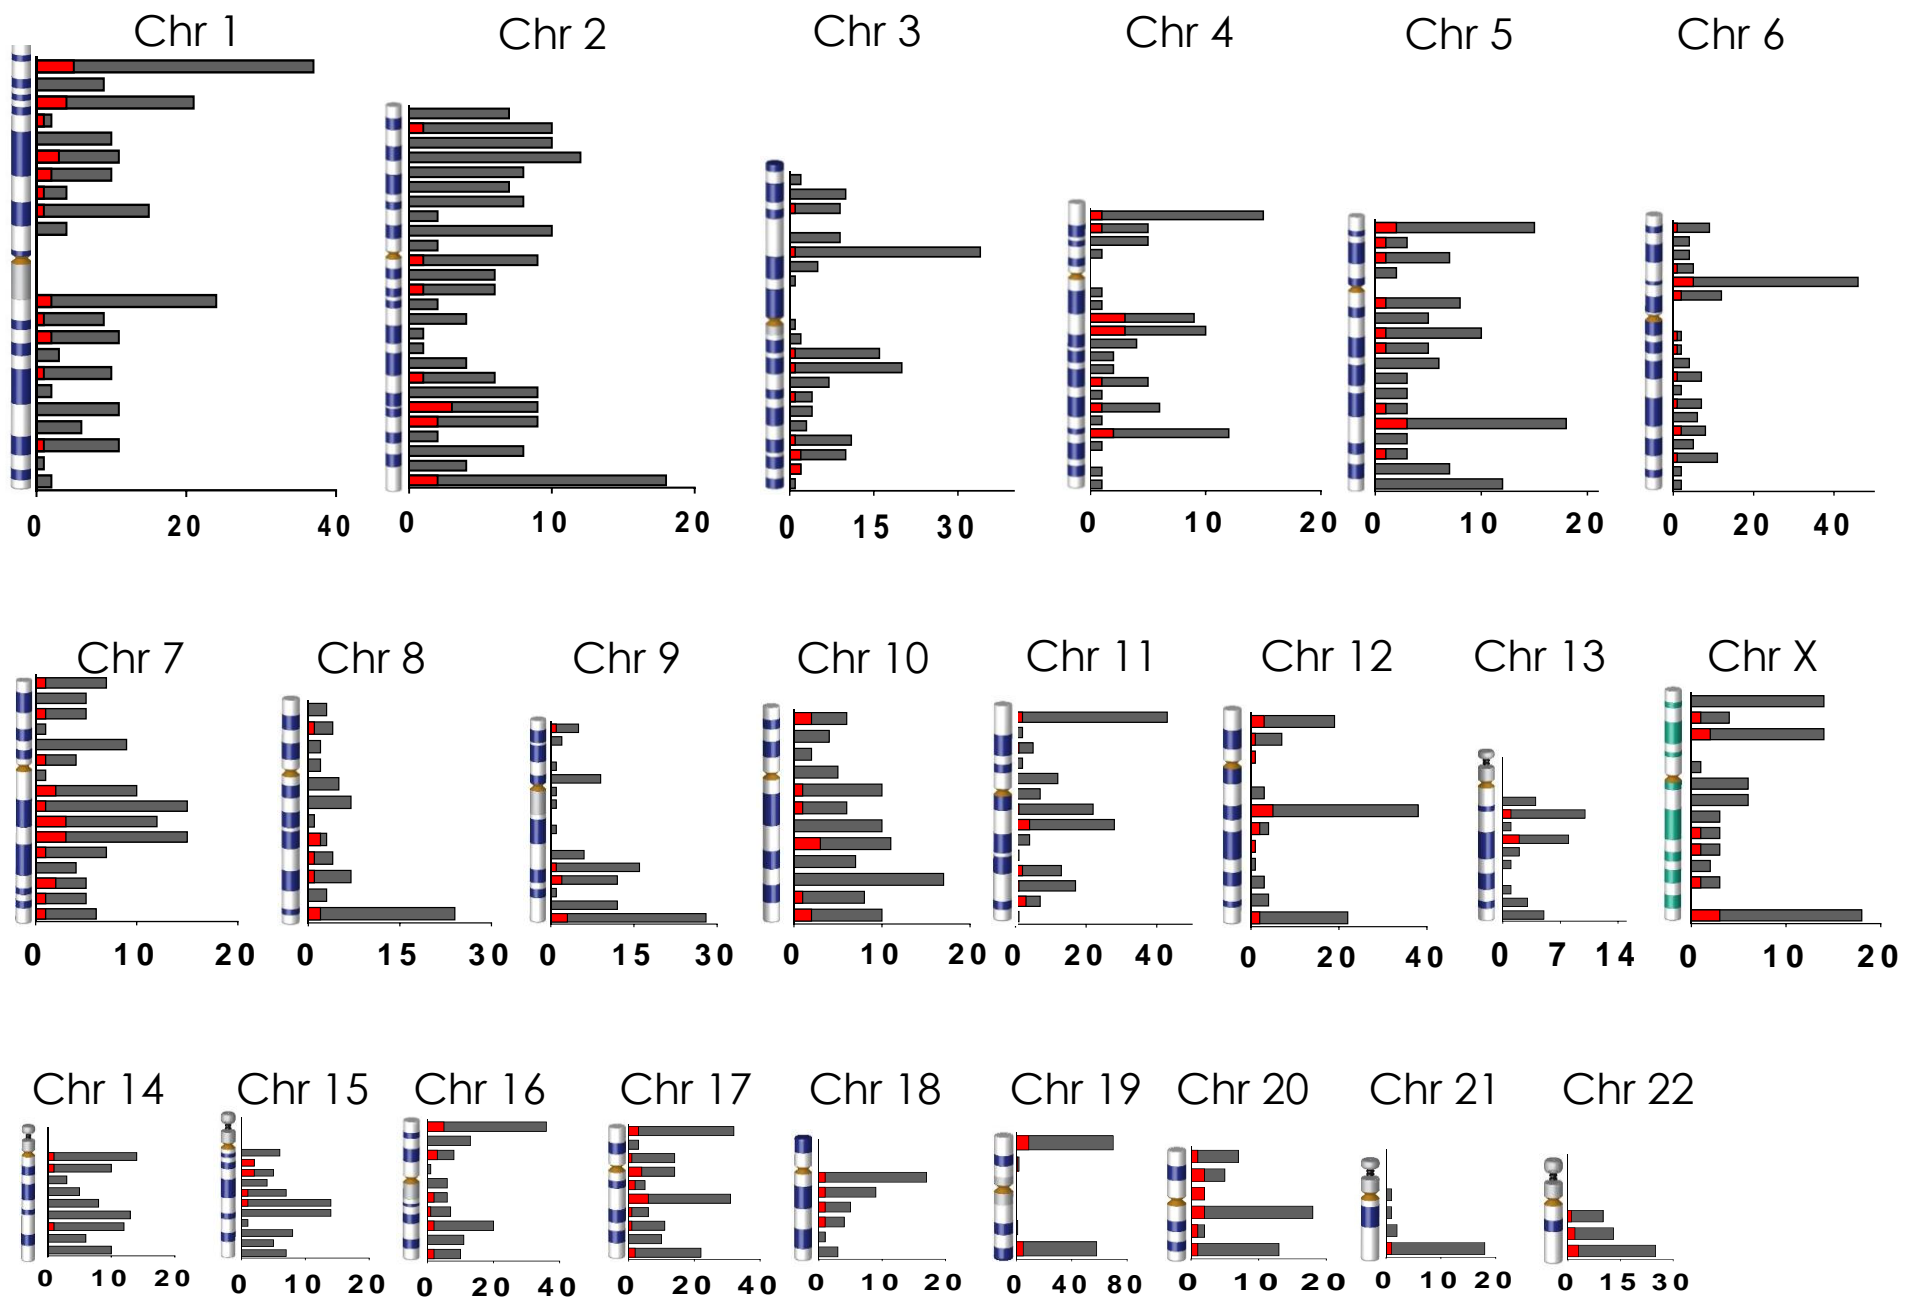

### C. HLA-B\*07;02-restricted self peptides

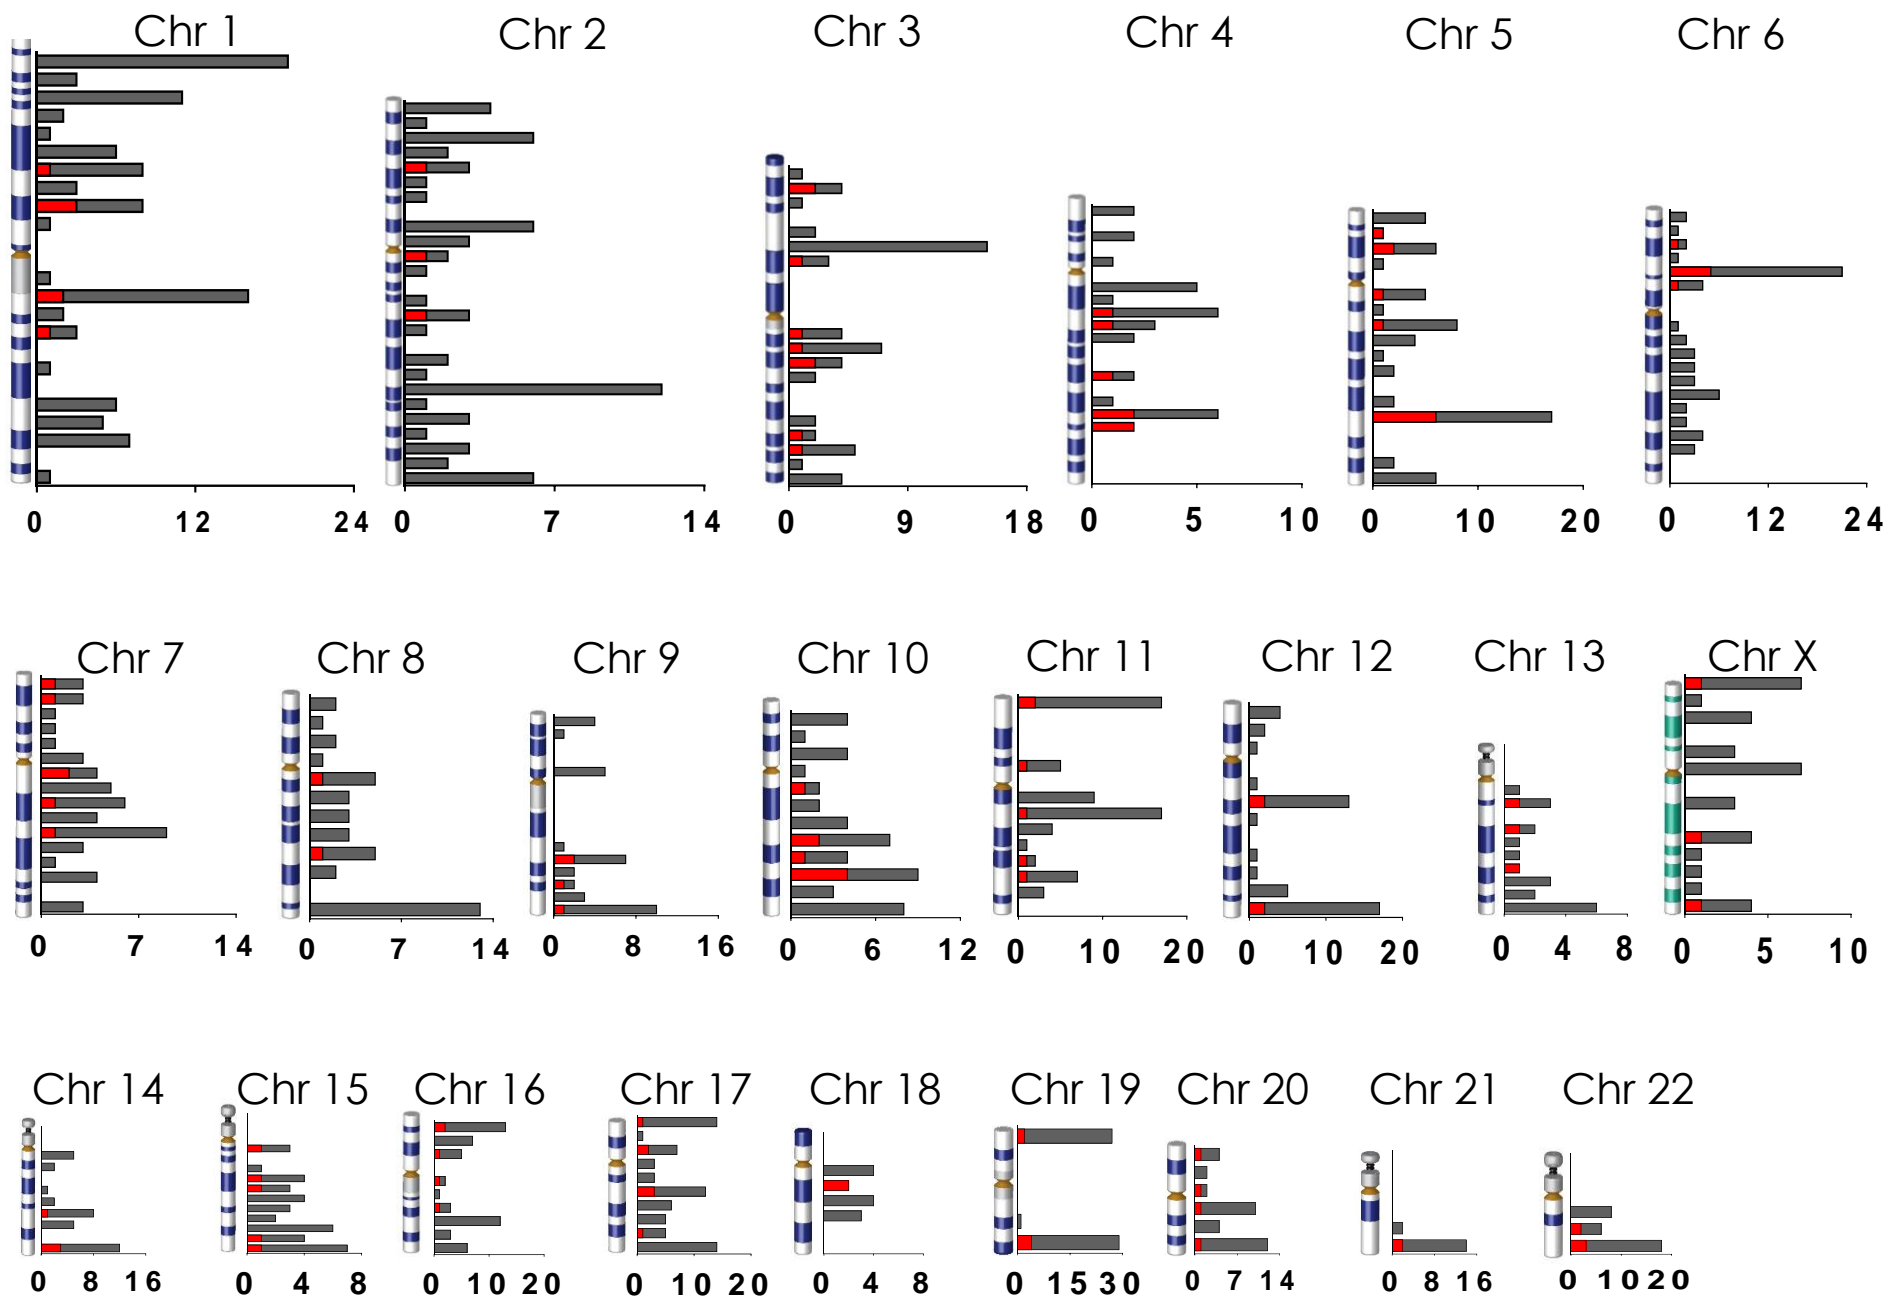

# D. HLA-B\*45:01-restricted self peptides

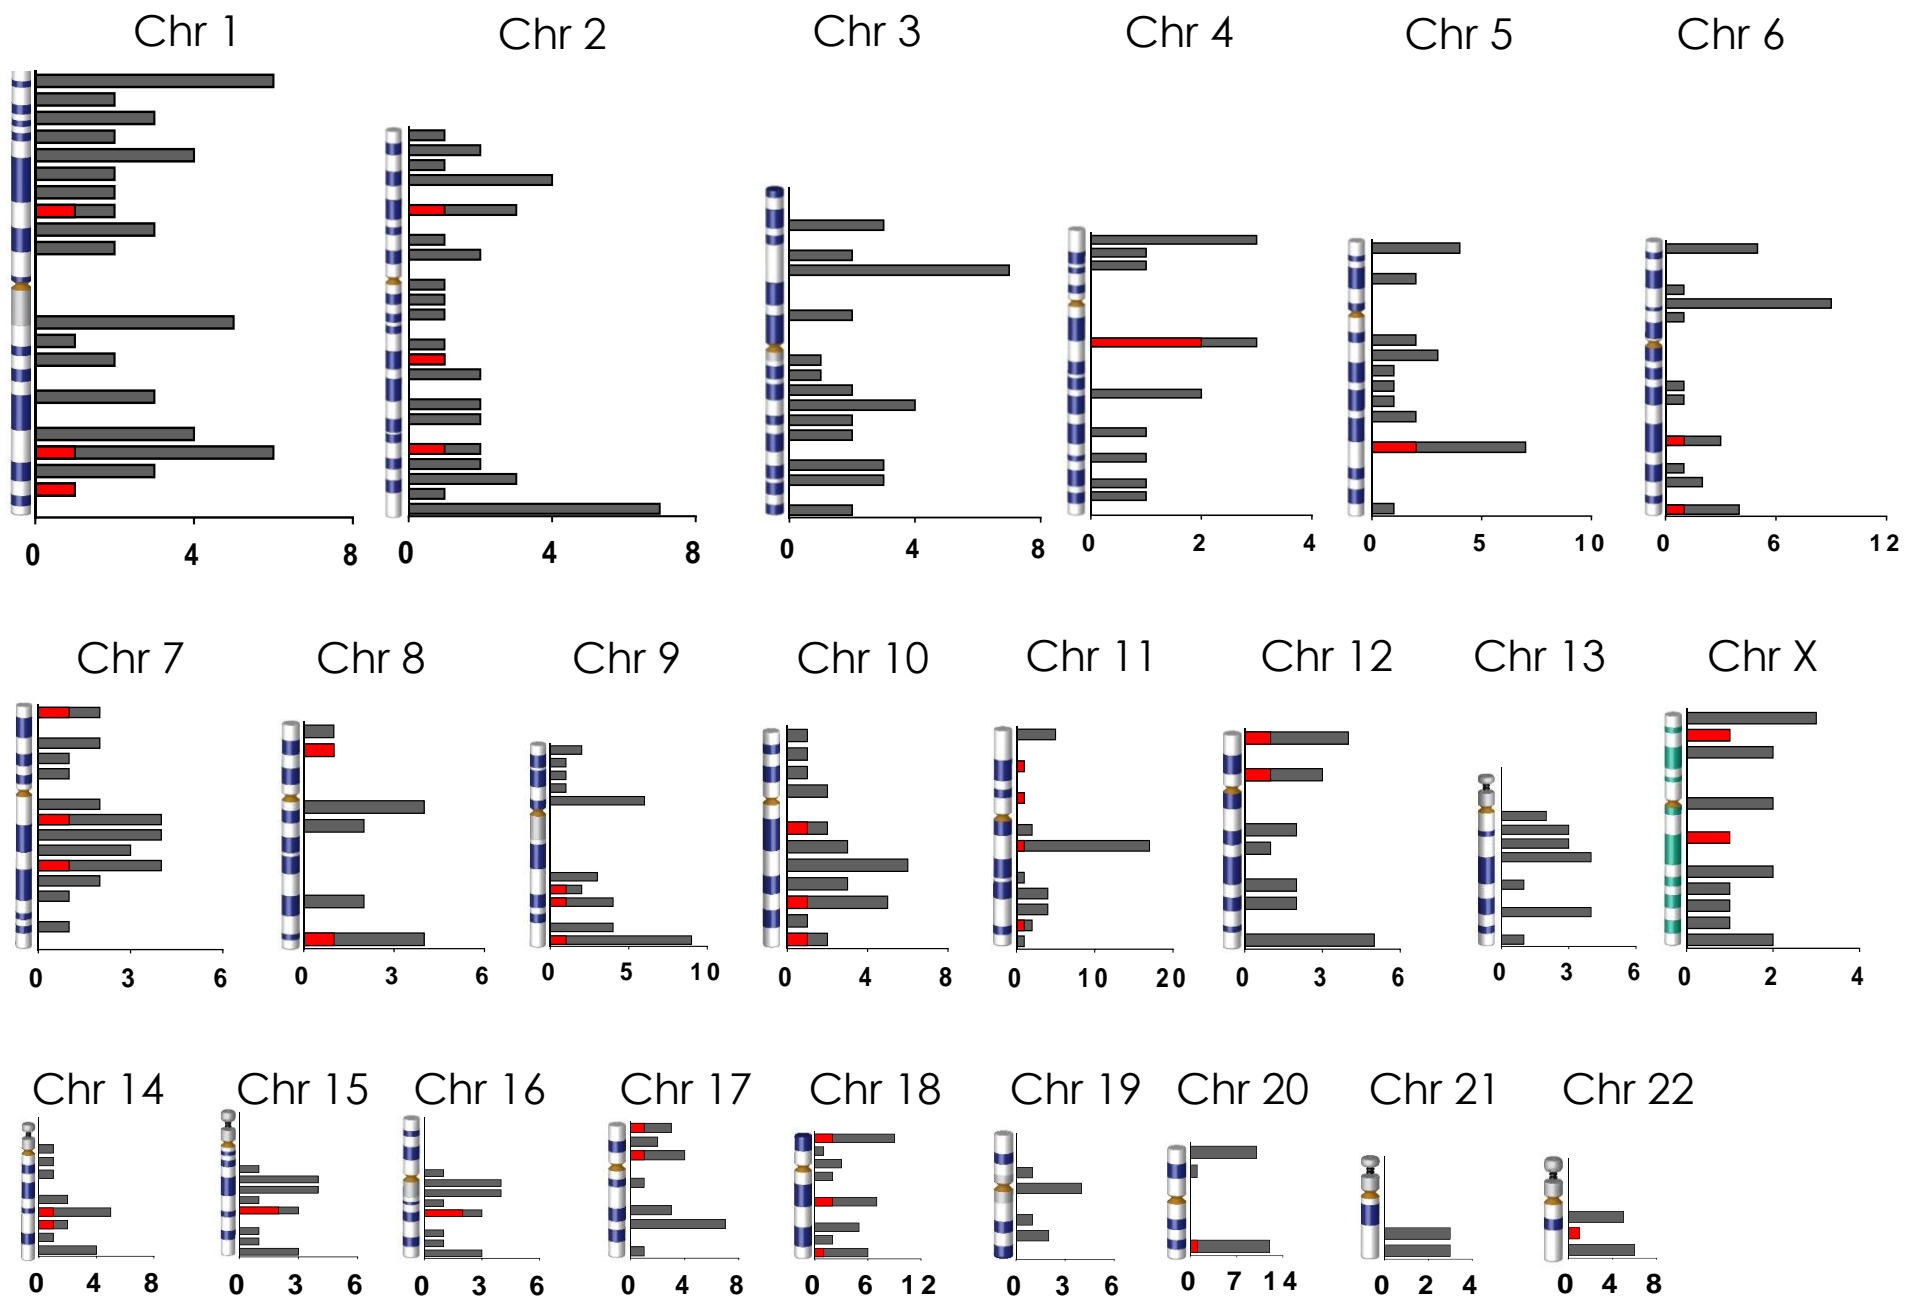



**Supplemental Figure 2: Peptides presented after infection are derived from proteins encoded by genes dispersed across the chromosomes.** The number of proteins from which peptides presented only after infection were derived is enumerated for each HLA class I molecule (gray bars). Due to size limitations, the locations of each peptide were grouped according to major banding patterns for each chromosome (e.g., 1p36) along the vertical axis, as in reference [22]). Note the scale of the x-axis varies for each chromosome. The number of proteins containing allopeptides in the human population are enumerated for each location (red bars).

**Supplemental Figure 3: Proteins from which newly presented allopeptides are derived are expressed in transplanted tissues.**

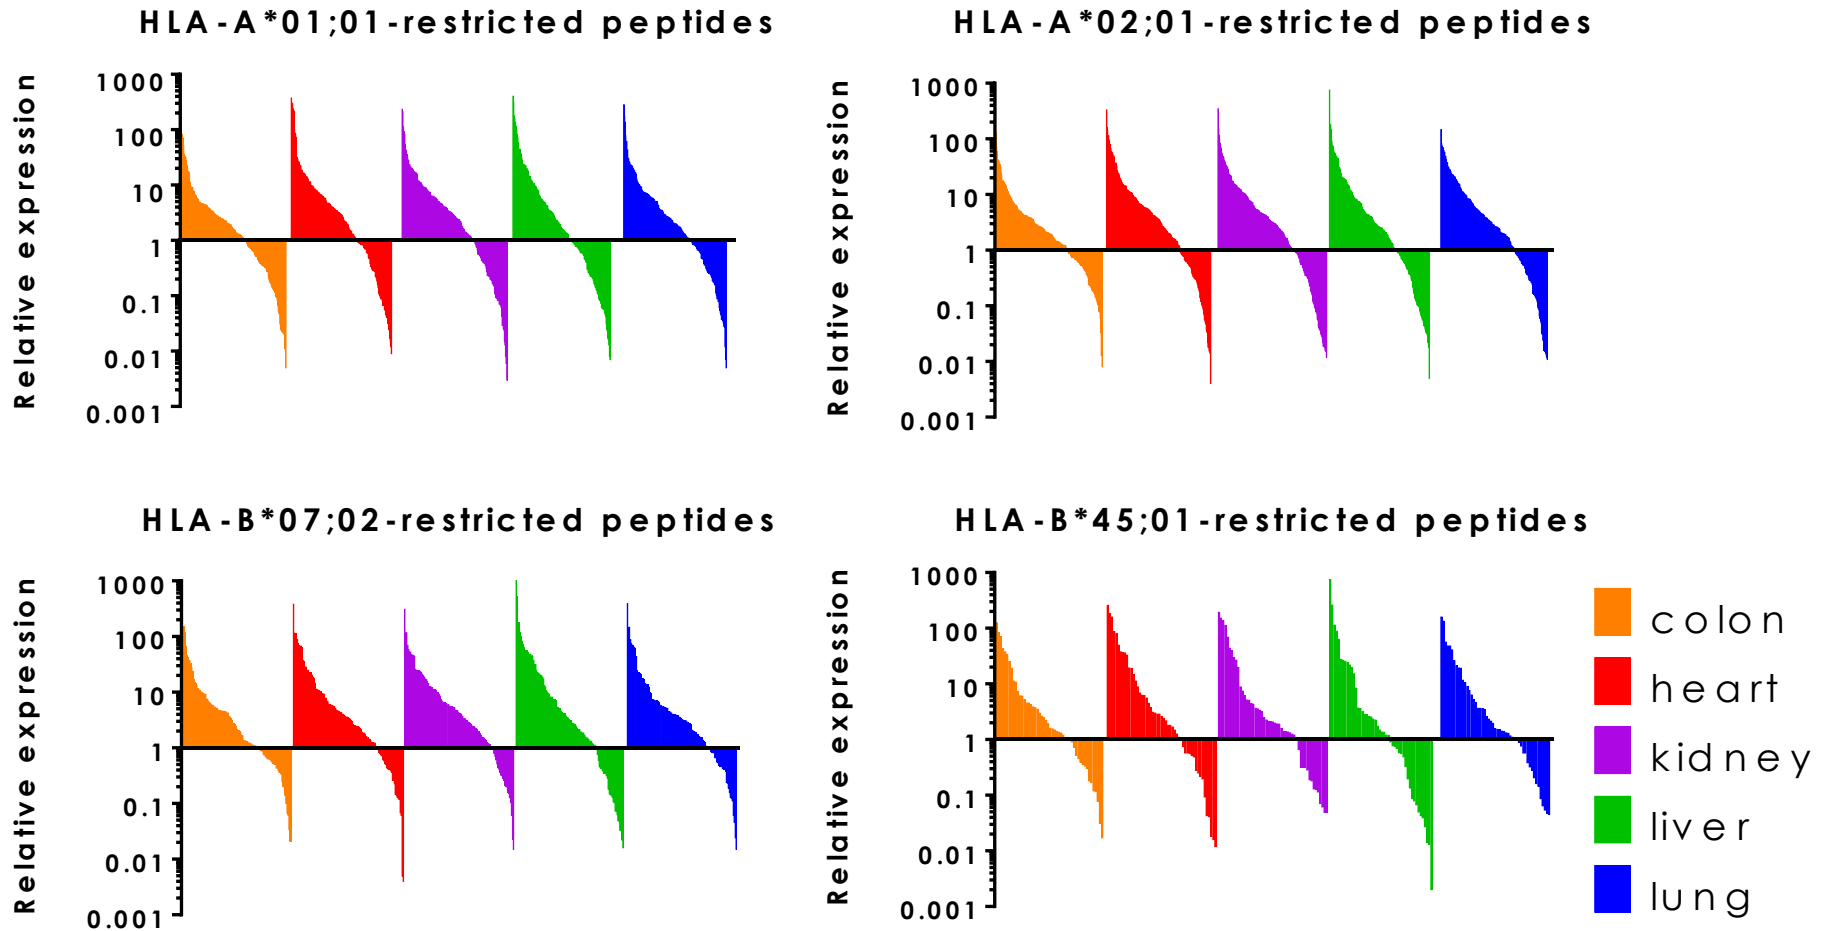

**Supplemental Figure 3: Proteins from which newly presented allopeptides are derived are expressed in transplanted tissues.** Proteins expressed by the colon, heart, kidney, liver and lung were identified by searching the TiGER database of tissue expression. This database consists of expression data from microarray, real-time PCR, proteomics, etc. studies and is reported as a fold change compared with housekeeping genes/proteins used in each respective assay. These proteins are variably expressed in the tissue yet all tissues express some proteins from which new peptides were derived after infection.
